# Supplementary material
Source: MDPI journal article supplement (https://www.mdpi.com/2076-3417/7/11/1203)
Supplement: s1 [file s1]

Supplementary Materials

Magnetic-Responsive Microparticles that Switch Shape at 37 oC

Koichiro Uto and Mitsuhiro Ebara*

**
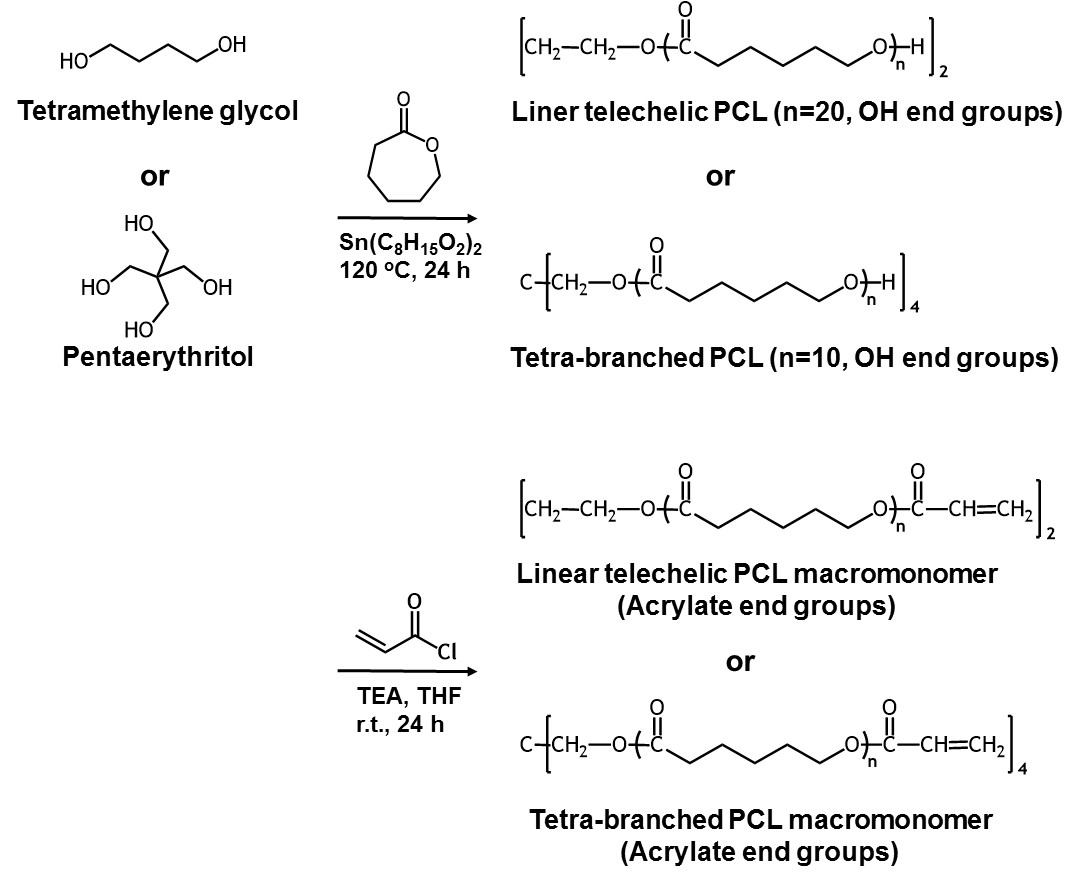
**

**Figure S1.** Synthesis of linear telechelic and tetra-branched PCL macromonomers.
